# Supplementary material for: Influence of anchoring moieties on new benzimidazole-based Schiff base copper(ii) complexes towards estrogen dependent breast cancer cells
Source: Royal Society of Chemistry journal article supplement (doi:10.1039/d0dt03873c), 2021-01-01
Supplement: d0dt03873c1.pdf [file d0dt03873c1.pdf]

## Electronic Supporting Information

### **Influence of anchoring moieties on new benzimidazole-based Schiff base copper(II) complexes towards estrogen dependent breast cancer cells**

Anup Paul,<sup>a‡,\*</sup> Priya Singh,<sup>b‡</sup> Maxim L. Kuznetsov,<sup>a</sup> Anirban Karmakar,<sup>a</sup> M. Fátima C. Guedes da Silva,<sup>a</sup> Biplob Koch,<sup>b\*</sup> Armando J. L. Pombeiro<sup>a,c</sup>

<sup>a</sup>*Centro de Química Estrutural, Instituto Superior Técnico, Universidade de Lisboa, Av. Rovisco Pais, 1049-001 Lisboa. Portugal.*

<sup>b</sup>*Departments of Zoology, Faculty of Science, Banaras Hindu University, Varanasi - 221 005 (U.P.) India.*

<sup>c</sup>*Peoples' Friendship University of Russia (RUDN University), 6 Miklukho-Maklaya Street, Moscow, 117198, Russian Federation*

<sup>‡</sup>*These authors contributed equally*

---

**Figure S1.** ESI-MS spectrum of **1**.

**Figure S2.** ESI-MS spectrum of **2**.

**Figure S3.** UV-vis spectra of **1** and **2** in DMF.

**Figure S4.** UV-vis spectra of **1** (A) and **2** (B) recorded in 1% DMF and DMSO solution with 5 mM Tris-HCl/50 mM NaCl buffer (pH 7.4).

**Figure S5.** The UV-vis absorbance of **2** ( $2.01 \times 10^{-5}$  M) in the absence and presence of CT-DNA ( $0-8.7 \times 10^{-7}$  M) at 25 °C in 5 mM Tris-HCl/50 mM NaCl buffer (pH 7.4). The arrow indicates the change in absorbance upon addition of DNA. (b) The non-linear fit of  $(\epsilon_a - \epsilon_f)/(\epsilon_b - \epsilon_f)$  vs. [DNA].

**Figure S6.** (a) Fluorescence emission spectrum of EB-DNA (EB = 3.3  $\mu$ M, DNA = 3.3  $\mu$ M) in the absence and in the presence of increasing concentration of **2** (0-25  $\mu$ M). The arrow indicates the changes in the emission intensity upon addition of complex **2**. (b) The corresponding Stern-Volmer plots of the EB-DNA fluorescence titration profile.

**Figure S7.** Plots of the HOMO, LUMO and spin density distribution in **1**<sup>+</sup>.

**Figure S8.** Molecular docked model of compound **2** with DNA (PDB ID: 1BNA).

**Figure S9.** Close view of the molecular docked model of compounds **1** (A) and **2** (B) with DNA (PDB ID: 1BNA).

**Table S1:** Crystal data and structure refinement detail for compound **1**.

**Table S2.** Selected bond distances (Å) and angles (°) for compound **1**.

**Table S3.** Hydrogen bond geometry (Å, °) in compound **1**.

**Table S4.** Cartesian atomic coordinates of the equilibrium structures.

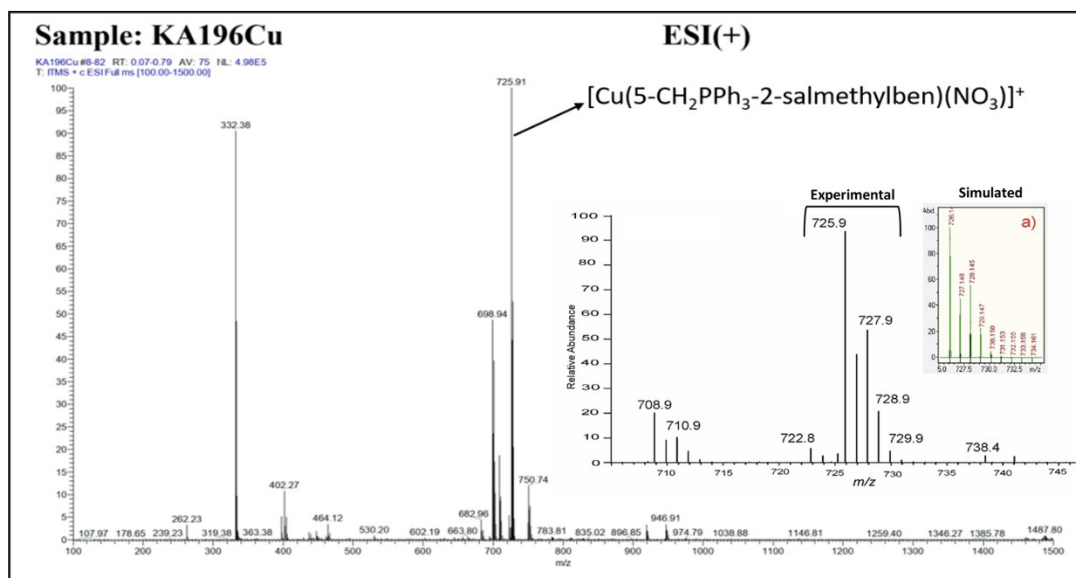

**Figure S1.** ESI-MS spectrum of **1** in MeOH. Inset showing the experimental and simulated isotopic mass distribution pattern of the parent ion peak.

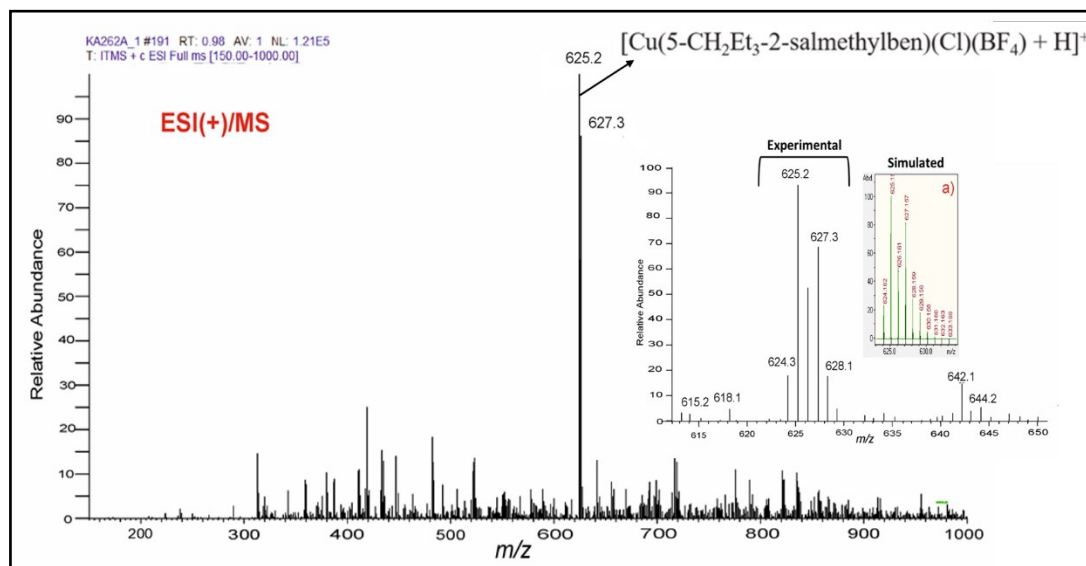

**Figure S2.** ESI-MS spectrum of **2** in MeOH. Inset showing the experimental and simulated isotopic mass distribution pattern of the parent ion peak.

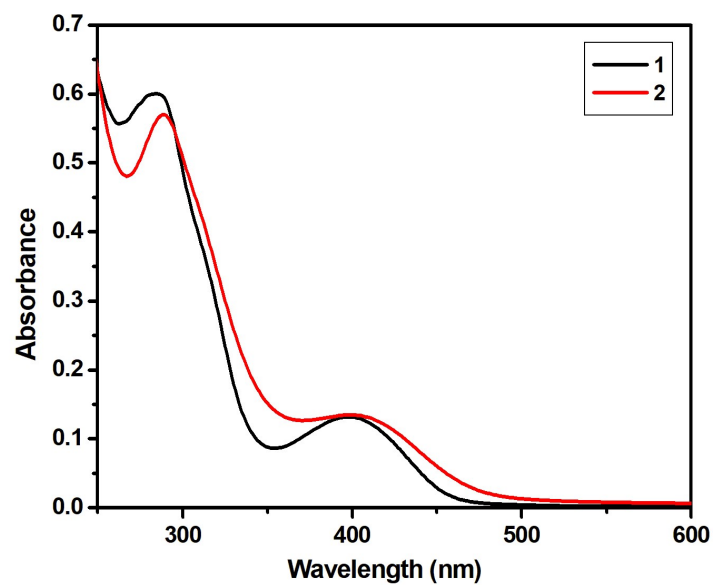

**Figure S3.** UV-vis spectra of **1** and **2** recorded in DMF solution.

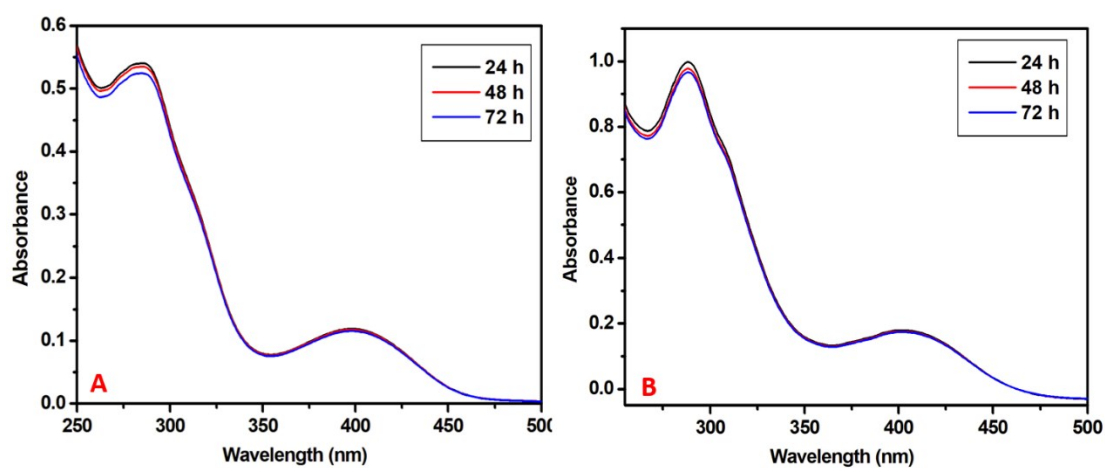

**Figure S4.** UV-vis spectra of **1** (A) and **2** (B) recorded in 1% DMF and DMSO solution with 5 mM Tris-HCl/50 mM NaCl buffer (pH 7.4).

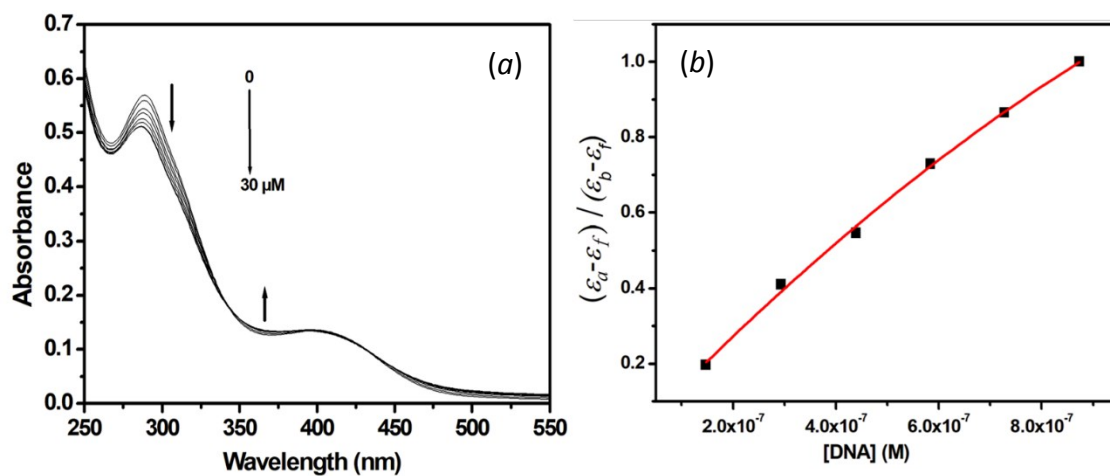

**Figure S5.** (a) Absorption spectra of complex **2** ( $2.01 \times 10^{-5}$  M) in the absence and presence of increasing amounts of CT-DNA ( $0-8.7 \times 10^{-7}$  M) at 25 °C in 5 mM Tris-HCl/50 mM NaCl buffer (pH 7.4). Arrow shows the absorbance changing upon increasing DNA concentrations. (b) The non-linear fit of  $(\epsilon_a - \epsilon_f)/(\epsilon_b - \epsilon_f)$  vs. [DNA].

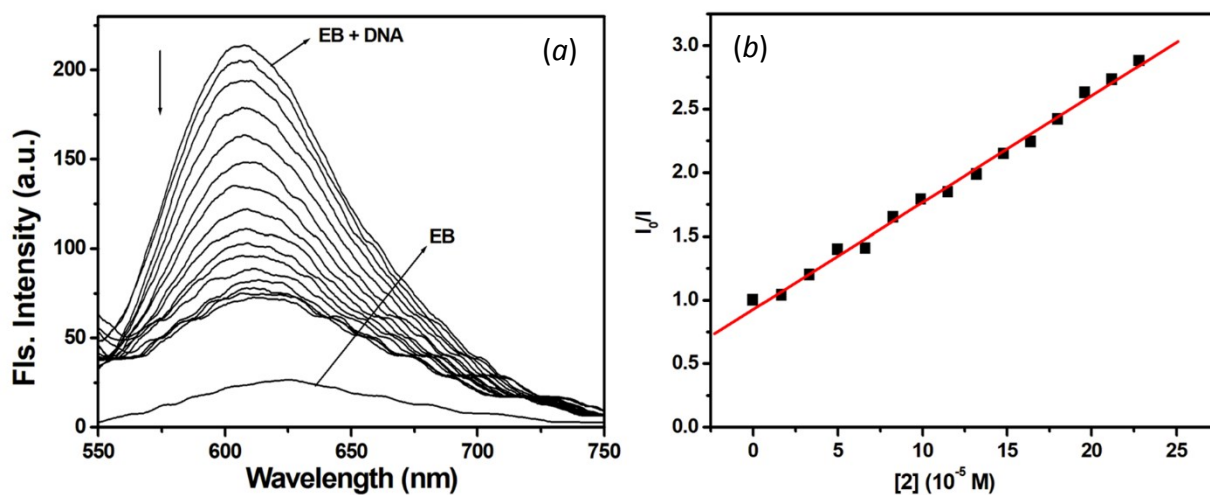

**Figure S6.** (a) Emission spectra from EB bound to the DNA in the absence and in the presence of **2** (a). [EB] = 3.3  $\mu$ M, [DNA] = 3.3  $\mu$ M, [**2**] = 0-25  $\mu$ M. (b) Arrow shows changes in the emission intensity upon addition of increasing complex concentration. Stern-Volmer plots of the EB-DNA fluorescence titration for complex **2**.

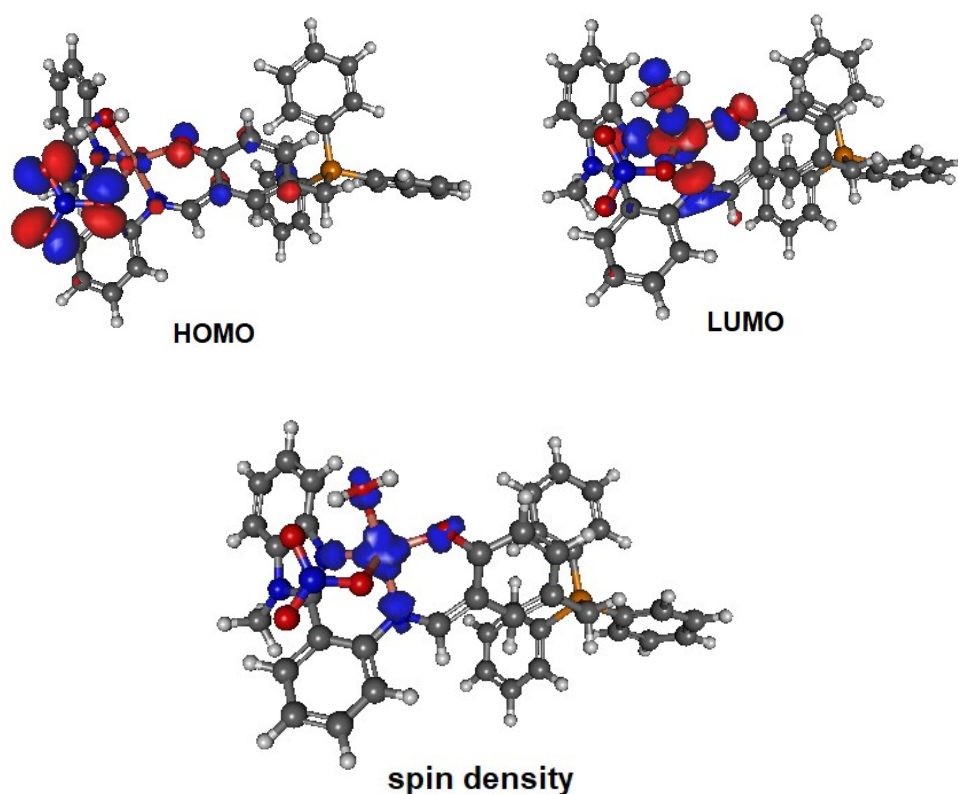

**Figure S7.** Plots of the HOMO, LUMO and spin density distribution in  $1^{2+}$ .

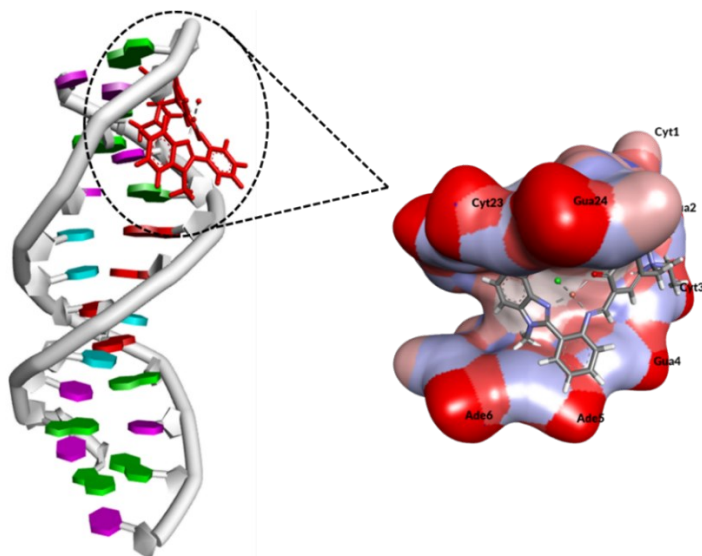

**Figure S8.** Molecular docked model of compound **2** with DNA (PDB ID: 1BNA).

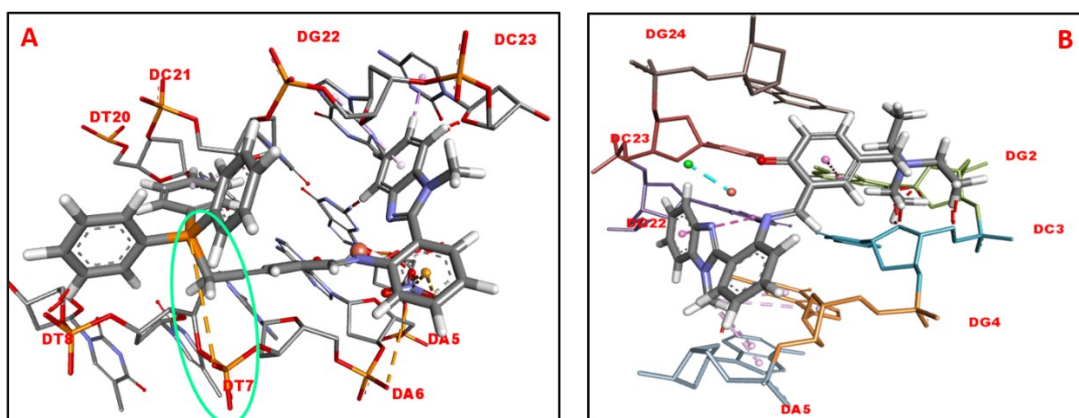

**Figure S9.** Close view of the molecular docked model of compounds **1** (A) and **2** (B) with DNA (PDB ID: 1BNA).

**Table S1:** Crystal data and structure refinement detail for compound **1**.

|                     |          |
|---------------------|----------|
| Identification name | <b>1</b> |
|---------------------|----------|

|                               |                                             |
|-------------------------------|---------------------------------------------|
| Formula                       | $C_{40.33}H_{36.67}BCuF_4N_4O_6P$           |
| Mol. wt.                      | 854.786                                     |
| Crystal system                | Triclinic                                   |
| Space group                   | P-1                                         |
| Temperature /K                | 296                                         |
| Wavelength /Å                 | 0.71073                                     |
| $a / \text{Å}$                | 9.9720(14)                                  |
| $b / \text{Å}$                | 11.9734(18)                                 |
| $c / \text{Å}$                | 16.945(3)                                   |
| $\alpha / ^\circ$             | 93.098(5)                                   |
| $\beta / ^\circ$              | 98.044(5)                                   |
| $\gamma / ^\circ$             | 109.200(5)                                  |
| $V / \text{Å}^3$              | 1881.0(5)                                   |
| Z                             | 2                                           |
| Density/Mgm <sup>-3</sup>     | 1.509                                       |
| Abs. Coeff. /mm <sup>-1</sup> | 0.698                                       |
| F(000)                        | 880.758                                     |
| Refl. collected               | 18407                                       |
| Refl. unique                  | 6615                                        |
| Max. $2\theta / ^\circ$       | 25.00                                       |
| Ranges (h, k, l)              | -11 ≤ h ≤ 11<br>-14 ≤ k ≤ 14<br>-20 ≤ l ≤ 0 |
| Complete to $2\theta$ (%)     | 99.86                                       |
| Refl. with $I > 2\sigma(I)$   | 4693                                        |
| Data/Restraints/Parameters    | 6615/73/583                                 |
| Goof ( $F^2$ )                | 1.0591                                      |
| R1 [ $I > 2s(I)$ ]            | 0.0439                                      |
| wR2 [ $I > 2s(I)$ ]           | 0.0790                                      |
| R1 [all data]                 | 0.0869                                      |
| wR2 [all data]                | 0.1000                                      |

**Table S2:** Selected bond distances (Å) and angles (°) for compound **1**.

|          |                                                                                                                                                                                                                                                                   |
|----------|-------------------------------------------------------------------------------------------------------------------------------------------------------------------------------------------------------------------------------------------------------------------|
| <b>1</b> | <p>Cu1-O2 1.965(2); Cu1-O6 1.908(2); Cu1-O3 2.598(2); Cu1-N1 1.971(2); Cu1-N3 1.956(2).</p> <p>&lt;O6-Cu1-O2 88.40(9); &lt;O3-Cu1-O2 82.94(8); &lt;O3-Cu1-O6 114.09(8); &lt;N1-Cu1-O2 92.60(9); &lt;N1-Cu1-O6 156.40(10); &lt;N1-Cu1-O3 89.41(9); &lt;N3-Cu1-</p> |
|----------|-------------------------------------------------------------------------------------------------------------------------------------------------------------------------------------------------------------------------------------------------------------------|

|  |                                                                                 |
|--|---------------------------------------------------------------------------------|
|  | O2 170.63(10); <N3-Cu1-O6 93.11(10); <N3-Cu1-O3 88.00(9); <N3-Cu1-N1 89.71(10). |
|--|---------------------------------------------------------------------------------|

**Table S3:** Hydrogen bond geometry (Å, °) in compound **1**.

| Compound | D-H...A        | D...H (Å) | H...A (Å) | D...A (Å) | <D-H...A(°) |
|----------|----------------|-----------|-----------|-----------|-------------|
| <b>1</b> | O2-H2A...O5    | 0.90      | 1.76      | 2.666(3)  | 179.9       |
|          | O2-H2B...O1B   | 0.90      | 1.79      | 2.687(2)  | 178.0       |
|          | O1B-H1Ba...O4  | 0.84      | 2.05      | 2.890(2)  | 170.6       |
|          | O1B-H1Bb...F1A | 0.85      | 2.09      | 2.908(3)  | 159.6       |
|          | C22-H22A...F1A | 0.97      | 2.52      | 3.410(5)  | 152.9       |
|          | C22-H22A...F2A | 0.97      | 2.93      | 3.850(1)  | 157.7       |
|          | C5-H5...O4     | 0.93      | 2.55      | 3.476(5)  | 172.7       |
|          | C38-H38...O5   | 0.93      | 2.70      | 3.452(5)  | 137.5       |

**Table S4.** Cartesian atomic coordinates of the equilibrium structures (nuclear charges are indicated in the first column).

**1<sup>+</sup>**

|    |           |           |           |
|----|-----------|-----------|-----------|
| 29 | 2.884140  | 0.654309  | -1.192611 |
| 15 | -4.816959 | -0.147879 | -0.072163 |
| 8  | 3.808188  | 2.288058  | -1.906179 |
| 1  | 4.662897  | 1.817965  | -2.172668 |
| 1  | 3.328992  | 2.466506  | -2.731296 |
| 8  | 1.240973  | 1.315732  | -2.005607 |
| 8  | 5.829341  | 0.643109  | -2.303742 |
| 8  | 3.998716  | -0.491145 | -2.646113 |
| 8  | 5.887624  | -1.516462 | -2.403582 |
| 7  | 4.033903  | 0.609977  | 0.459233  |
| 7  | 2.060462  | -1.052436 | -0.641212 |
| 7  | 5.265235  | -0.472513 | -2.451735 |
| 7  | 4.957274  | -0.305979 | 2.261427  |
| 6  | 0.074204  | 0.801900  | -1.914661 |
| 6  | 4.338280  | -0.529277 | 1.061644  |
| 6  | -0.219422 | -0.447805 | -1.264332 |
| 6  | -6.573378 | -0.539936 | -0.154078 |
| 6  | 4.481970  | 1.633634  | 1.272753  |
| 6  | -2.600513 | -0.208516 | -1.760361 |
| 6  | -7.240941 | -0.981151 | 0.994036  |
| 1  | -6.696989 | -1.122372 | 1.927191  |

|   |           |           |           |
|---|-----------|-----------|-----------|
| 6 | 4.424344  | 3.019188  | 1.115588  |
| 1 | 3.991998  | 3.455222  | 0.217950  |
| 6 | -3.293932 | 2.128057  | 0.381179  |
| 1 | -2.434879 | 1.460455  | 0.439633  |
| 6 | 4.099638  | -1.845850 | 0.474040  |
| 6 | 2.979100  | -2.085861 | -0.350057 |
| 6 | -2.305563 | 1.004153  | -2.427383 |
| 1 | -3.119809 | 1.566195  | -2.889489 |
| 6 | -1.027692 | 1.489273  | -2.504797 |
| 1 | -0.803823 | 2.417150  | -3.026720 |
| 6 | -4.019980 | -0.673283 | -1.642869 |
| 1 | -4.122570 | -1.767202 | -1.694249 |
| 1 | -4.635350 | -0.260982 | -2.454877 |
| 6 | -4.584194 | 1.617380  | 0.170819  |
| 6 | 5.068901  | 1.067510  | 2.413358  |
| 6 | 0.796008  | -1.310991 | -0.744622 |
| 1 | 0.453620  | -2.304451 | -0.418233 |
| 6 | 2.834091  | -3.328900 | -0.964978 |
| 1 | 2.015804  | -3.477215 | -1.666955 |
| 6 | -4.096094 | -1.074760 | 1.293104  |
| 6 | -1.549290 | -0.911476 | -1.207151 |
| 1 | -1.736344 | -1.868736 | -0.712654 |
| 6 | -3.112194 | 3.497108  | 0.514013  |
| 1 | -2.112160 | 3.894704  | 0.671689  |
| 6 | 5.043199  | -2.865596 | 0.634823  |
| 1 | 5.953897  | -2.664632 | 1.194382  |
| 6 | -8.603663 | -1.244840 | 0.941829  |
| 1 | -9.121233 | -1.589033 | 1.834250  |
| 6 | -8.643722 | -0.627535 | -1.392363 |
| 1 | -9.191036 | -0.490858 | -2.322107 |
| 6 | 4.964445  | 3.793608  | 2.129140  |
| 1 | 4.946452  | 4.877503  | 2.037927  |
| 6 | -7.282247 | -0.358239 | -1.348473 |
| 1 | -6.783043 | 0.002904  | -2.247165 |
| 6 | 3.767266  | -4.336243 | -0.765915 |
| 1 | 3.645263  | -5.290732 | -1.273051 |
| 6 | -3.690858 | -0.439175 | 2.469120  |
| 1 | -3.756768 | 0.643646  | 2.561016  |
| 6 | -5.486424 | 3.852577  | 0.239968  |
| 1 | -6.338905 | 4.525930  | 0.190801  |
| 6 | -4.205920 | 4.356845  | 0.441489  |
| 1 | -4.057695 | 5.429611  | 0.545927  |
| 6 | -4.027848 | -2.470902 | 1.191717  |
| 1 | -4.369978 | -2.980655 | 0.290167  |
| 6 | -5.681124 | 2.483349  | 0.103176  |
| 1 | -6.684431 | 2.088597  | -0.050439 |



|   |            |           |           |
|---|------------|-----------|-----------|
| 6 | -9.302319  | -1.072016 | -0.249103 |
| 1 | -10.368503 | -1.284396 | -0.287290 |
| 6 | 4.879956   | -4.103675 | 0.031950  |
| 1 | 5.641961   | -4.869364 | 0.153642  |
| 6 | -3.203495  | -1.196085 | 3.529655  |
| 1 | -2.887882  | -0.699874 | 4.444535  |
| 6 | 5.613160   | 1.840928  | 3.434119  |
| 1 | 6.081319   | 1.396572  | 4.310363  |
| 6 | -3.539984  | -3.218329 | 2.253733  |
| 1 | -3.488388  | -4.301777 | 2.174387  |
| 6 | 5.548152   | 3.216050  | 3.269314  |
| 1 | 5.968554   | 3.863374  | 4.035918  |
| 6 | -3.125063  | -2.579792 | 3.420932  |
| 1 | -2.746060  | -3.168468 | 4.253573  |
| 6 | 5.312386   | -1.253188 | 3.299048  |
| 1 | 4.778886   | -2.193973 | 3.144269  |
| 1 | 5.016192   | -0.838810 | 4.269165  |
| 1 | 6.392061   | -1.446084 | 3.309942  |

2<sup>+</sup>

|    |           |           |           |
|----|-----------|-----------|-----------|
| 29 | -1.715031 | -0.720394 | -1.273544 |
| 7  | 5.869153  | -0.032932 | 0.764408  |
| 17 | -2.805343 | -2.125882 | -2.545337 |
| 8  | 0.040436  | -1.474680 | -1.665088 |
| 7  | -3.151192 | -0.385192 | 0.050050  |
| 7  | -0.891526 | 1.061605  | -0.782938 |
| 7  | -4.295166 | 0.700507  | 1.613928  |
| 6  | 1.186657  | -0.998268 | -1.408206 |
| 6  | -3.457028 | 0.806855  | 0.537072  |
| 6  | 1.428061  | 0.309014  | -0.851056 |
| 6  | 7.257273  | 0.565127  | 0.858568  |
| 6  | -3.825504 | -1.325185 | 0.807993  |
| 6  | 3.844387  | -0.085067 | -0.834064 |
| 6  | -3.864175 | -2.717196 | 0.715630  |
| 1  | -3.329347 | -3.230526 | -0.080980 |
| 6  | -3.015397 | 2.064820  | -0.059257 |
| 6  | -1.758804 | 2.174071  | -0.694295 |
| 6  | 3.605426  | -1.350897 | -1.437089 |
| 1  | 4.451868  | -1.981665 | -1.715330 |
| 6  | 2.342321  | -1.791600 | -1.706808 |
| 1  | 2.159741  | -2.756606 | -2.174005 |
| 6  | 5.221546  | 0.409930  | -0.579974 |
| 1  | 5.242537  | 1.503958  | -0.543295 |
| 1  | 5.932206  | 0.086089  | -1.349117 |
| 6  | 5.967071  | -1.544889 | 0.829062  |
| 6  | -4.548770 | -0.650592 | 1.801146  |

|   |           |           |           |
|---|-----------|-----------|-----------|
| 6 | 0.383046  | 1.253984  | -0.627334 |
| 1 | 0.711025  | 2.252215  | -0.297751 |
| 6 | -1.401775 | 3.382741  | -1.296908 |
| 1 | -0.463421 | 3.440649  | -1.845780 |
| 6 | 4.980579  | 0.445318  | 1.894013  |
| 6 | 2.746271  | 0.717448  | -0.580786 |
| 1 | 2.896979  | 1.720668  | -0.170582 |
| 6 | -3.868460 | 3.173910  | -0.067686 |
| 1 | -4.865616 | 3.078616  | 0.356311  |
| 6 | -4.636431 | -3.387428 | 1.648487  |
| 1 | -4.700719 | -4.472278 | 1.603909  |
| 6 | -2.252225 | 4.479560  | -1.265716 |
| 1 | -1.955648 | 5.404992  | -1.754414 |
| 6 | -3.494242 | 4.375031  | -0.652645 |
| 1 | -4.184287 | 5.215108  | -0.655579 |
| 6 | -5.325993 | -1.320565 | 2.742060  |
| 1 | -5.895862 | -0.793580 | 3.504684  |
| 6 | -5.353780 | -2.702858 | 2.645213  |
| 1 | -5.954644 | -3.271957 | 3.351303  |
| 6 | -4.731943 | 1.725418  | 2.541616  |
| 1 | -4.089176 | 2.604951  | 2.458073  |
| 1 | -4.652327 | 1.330807  | 3.560485  |
| 1 | -5.773150 | 2.015950  | 2.354927  |
| 1 | 4.016709  | -0.051237 | 1.736685  |
| 1 | 4.819101  | 1.515206  | 1.716623  |
| 6 | 5.499609  | 0.204142  | 3.294018  |
| 1 | 7.758936  | 0.050571  | 1.687713  |
| 6 | 7.320843  | 2.065567  | 1.040405  |
| 1 | 7.773569  | 0.275149  | -0.062837 |
| 1 | 4.940556  | -1.909285 | 0.706944  |
| 1 | 6.290644  | -1.785402 | 1.846693  |
| 6 | 6.901305  | -2.192026 | -0.169741 |
| 1 | 6.776476  | -3.277209 | -0.081990 |
| 1 | 7.956573  | -1.978204 | 0.029092  |
| 1 | 6.681501  | -1.931536 | -1.211236 |
| 1 | 6.877474  | 2.405706  | 1.982428  |
| 1 | 6.861944  | 2.620519  | 0.215072  |
| 1 | 8.378068  | 2.352329  | 1.061868  |
| 1 | 5.562605  | -0.856955 | 3.556393  |
| 1 | 4.787624  | 0.655868  | 3.993801  |
| 1 | 6.473217  | 0.669841  | 3.483624  |
